# Supplementary material for: A Label-Free Carbohydrate-Based Electrochemical Sensor to Detect Escherichia coli Pathogenic Bacteria Using D-mannose on a Glassy Carbon Electrode
Source: MDPI journal article supplement (doi:10.3390/bios13060619), 2023-06-05
Supplement: s1 [file s1]

# Supplementary Material

Article

## A Label-Free Carbohydrate-Based Electrochemical Sensor to Detect *Escherichia coli* Pathogenic Bacteria Using D-mannose on a Glassy Carbon Electrode

Sakineh Hargol Zadeh <sup>1</sup>, Soheila Kashanian <sup>1,2,\*</sup> and Maryam Nazari <sup>1</sup>

<sup>1</sup> Faculty of Chemistry, Applied Chemistry Department, Razi University, Kermanshah 6714414971, Iran

<sup>2</sup> Nanobiotechnology Department, Faculty of Innovative Science and Technology, Razi University, Kermanshah 6714414971, Iran

\* Correspondence: kashanian\_s@yahoo.com

**Table S1.** The results of sensor selectivity evaluation.

| Bacteria        | Number of Bacteria<br>(CFU.mL <sup>-1</sup> ) | Concentration<br>(CFU.mL <sup>-1</sup> ) | $\Delta R$ (Average)<br>( $\Omega$ ) | STDV<br>(Average) (%) | Selectivity<br>Coefficient (%) |
|-----------------|-----------------------------------------------|------------------------------------------|--------------------------------------|-----------------------|--------------------------------|
| <i>E.coli</i>   | 1300000                                       | 10 <sup>6</sup>                          | 59.70                                | 6.58                  | 86.48                          |
| <i>PTCC1856</i> | 1170000                                       | 10 <sup>6</sup>                          | 3.28                                 | 1.08                  | 4.75                           |
| <i>PTCC1600</i> | 1560000                                       | 10 <sup>6</sup>                          | 6.05                                 | 0.88                  | 8.78                           |
